# Supplementary material for: Protective Effects of Black Raspberry (Rubus occidentalis) Extract against Hypercholesterolemia and Hepatic Inflammation in Rats Fed High-Fat and High-Choline Diets
Source: PubMed Central journal article supplement (PMC7468928; doi:10.3390/nu12082448), 2020-08-14
Supplement: nutrients-12-02448-s001.pdf [file nutrients-12-02448-s001.pdf]

## Supplementary File

**Table S1. Composition of experimental diets**

| Ingredient          | Control diet |               | High-fat diet |               |
|---------------------|--------------|---------------|---------------|---------------|
|                     | Weight (g)   | Energy (kcal) | Weight (g)    | Energy (kcal) |
| Casein              | 200          | 800           | 233           | 932           |
| L-Cystine           | 3            | 12            | 3.5           | 14            |
| Corn starch         | 397          | 1590          | 84.8          | 339.2         |
| Maltodextrin        | 132          | 528           | 116.5         | 466           |
| Sucrose             | 100          | 400           | 201.4         | 805.6         |
| Cellulose           | 50           | 0             | 58.3          | 0             |
| Soybean oil         | 70           | 630           | 29.1          | 261.9         |
| Lard                | -            | -             | 206.9         | 1862.1        |
| TBHQ                | 0.014        | 0             | -             | -             |
| Mineral mixture     | 35           | 0             | 11.7          | 0             |
| Dicalcium phosphate | -            | -             | 15.2          | 0             |
| Calcium carbonate   | -            | -             | 6.4           | 0             |
| Potassium citrate   | -            | -             | 19.2          | 0             |
| Vitamin mixture     | 10           | 40            | 11.7          | 46.8          |
| Choline bitartrate  | 2.5          | 0             | 2.3           | 0             |
| Total               | 1000         | 4000          | 1000          | 4727.6        |
